# Supplementary material
Source: PubMed Central journal article supplement (PMC2643833)

A.

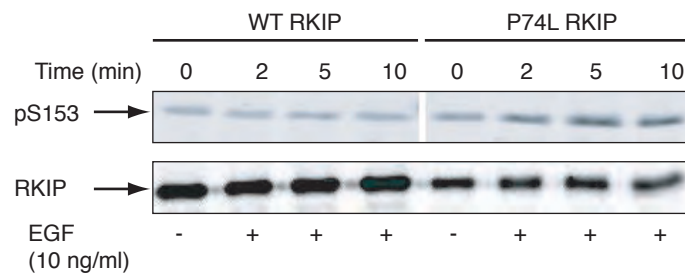

B.

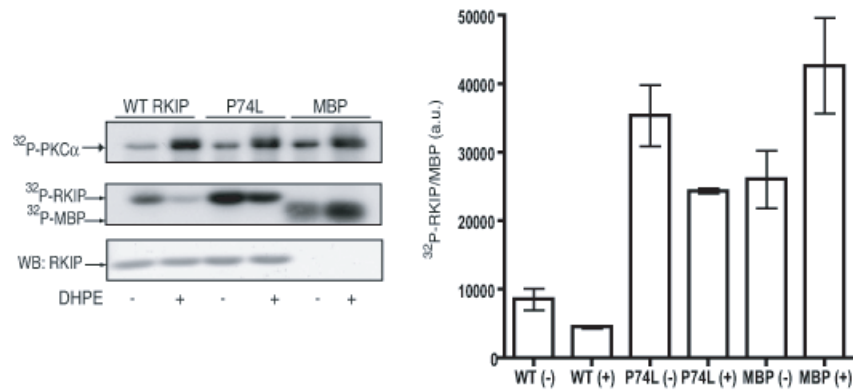

C.

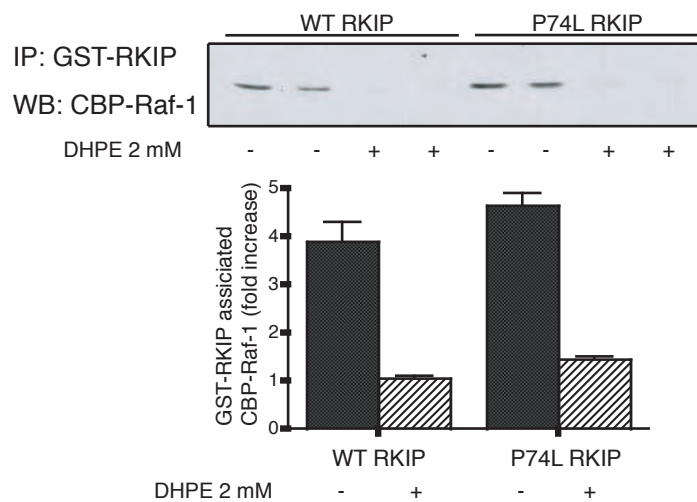

A. WT vs. P74L

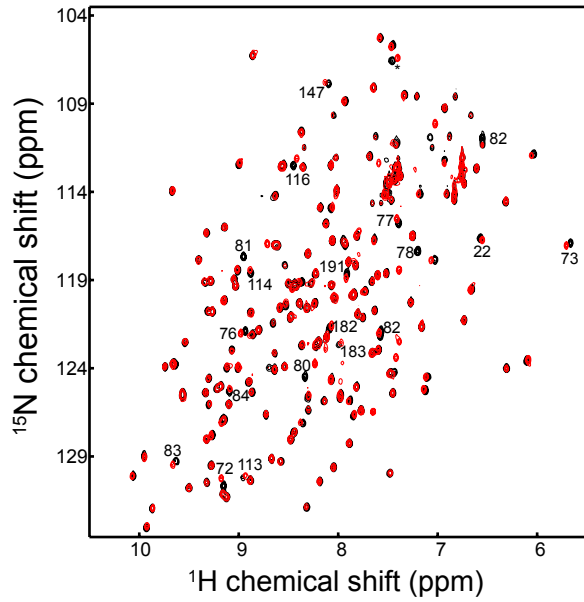

B. WT vs. S153E

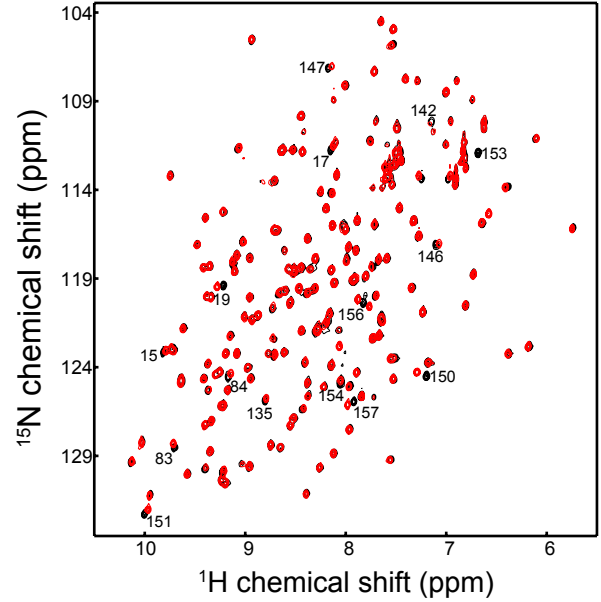

C. P74L – WT

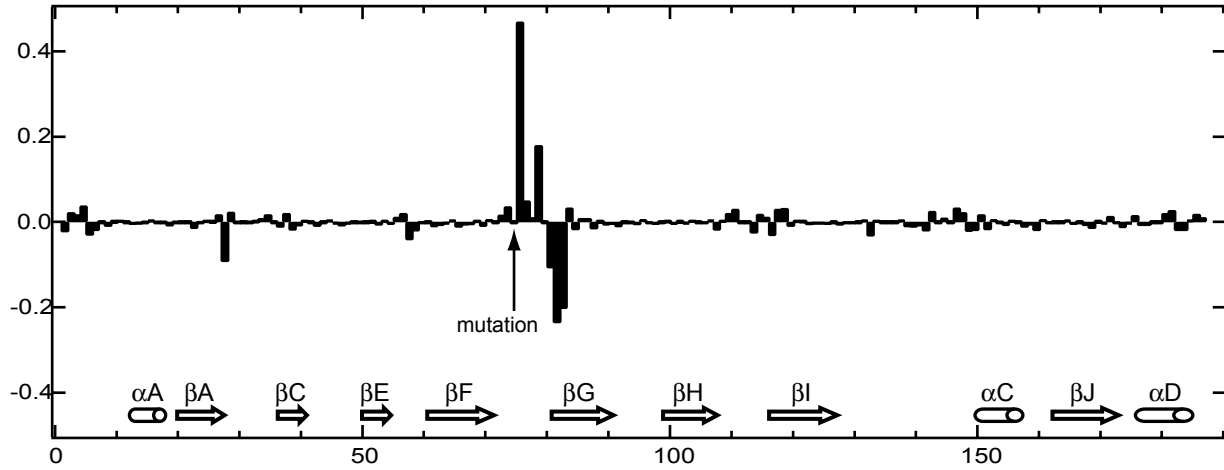

D. S153E – WT

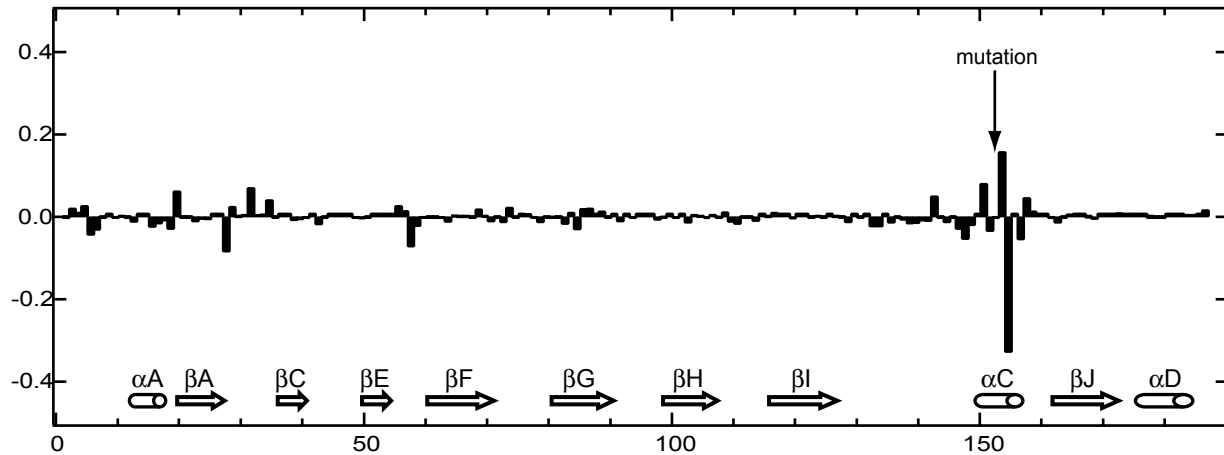

Granovsky et al., Supplementary Figure 3

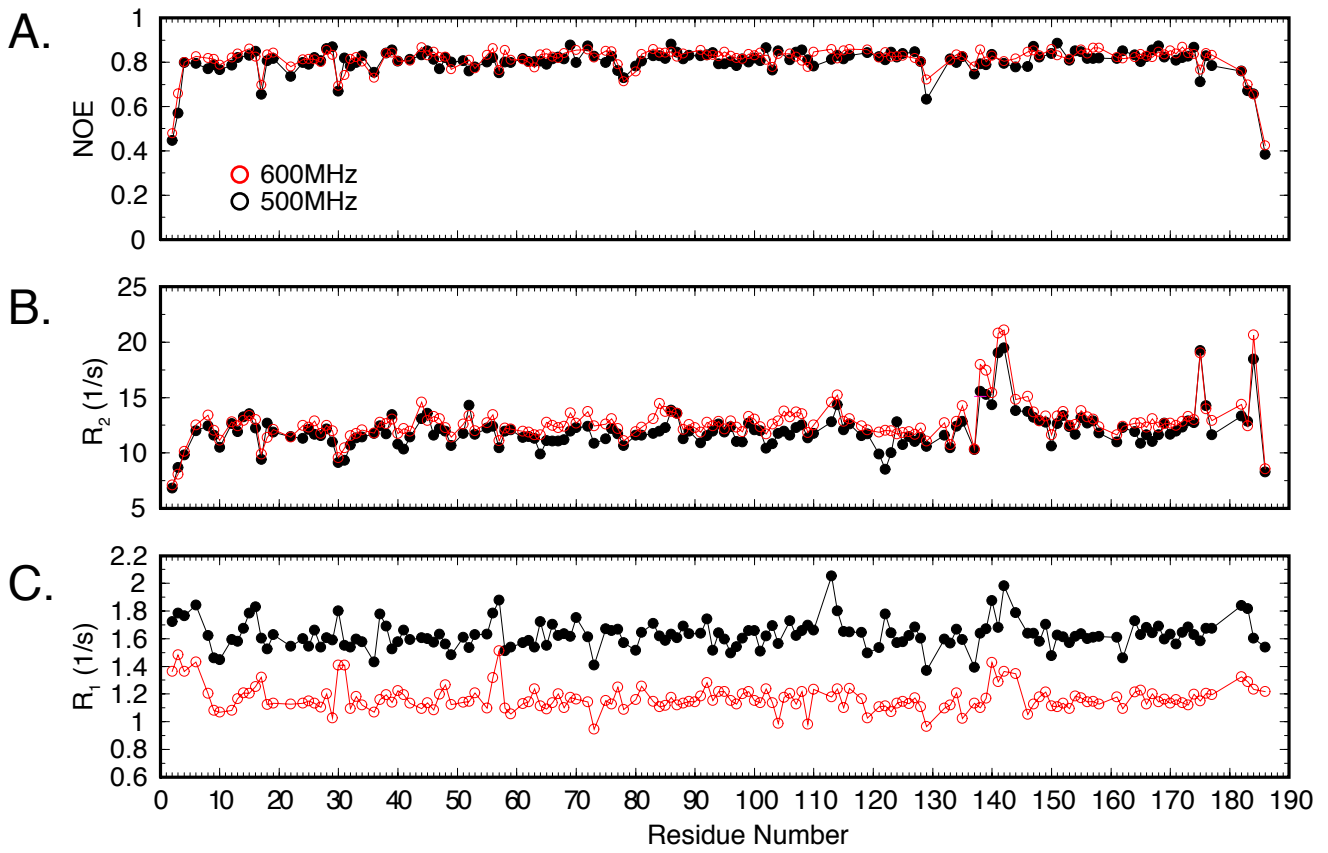

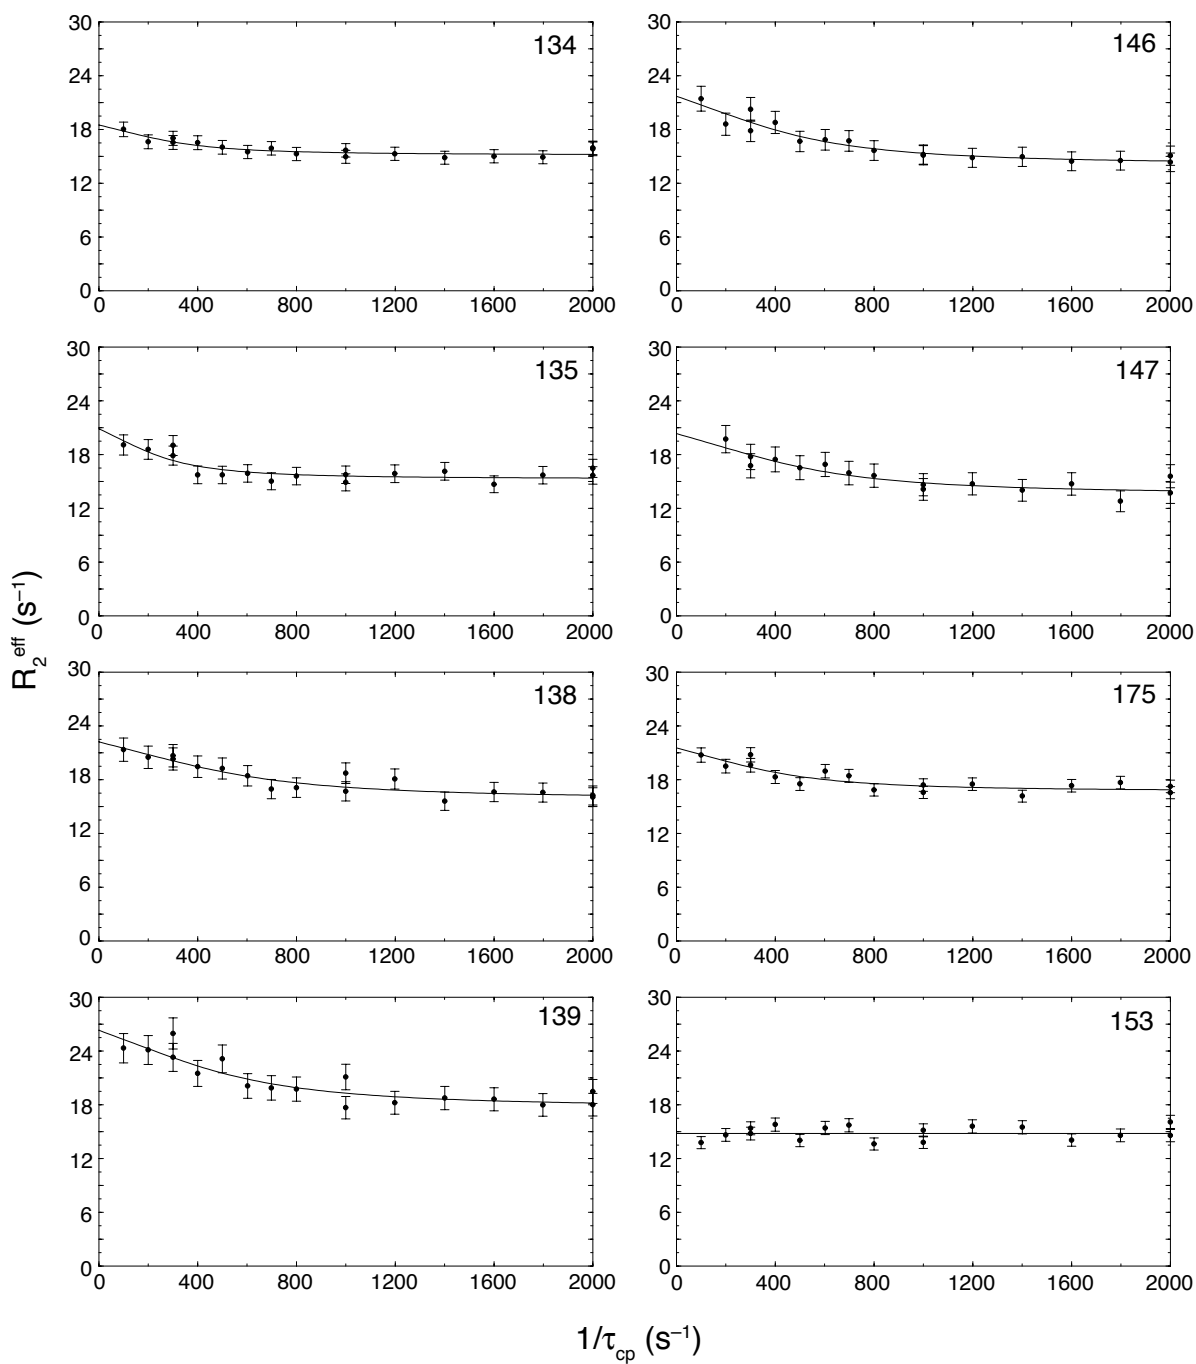

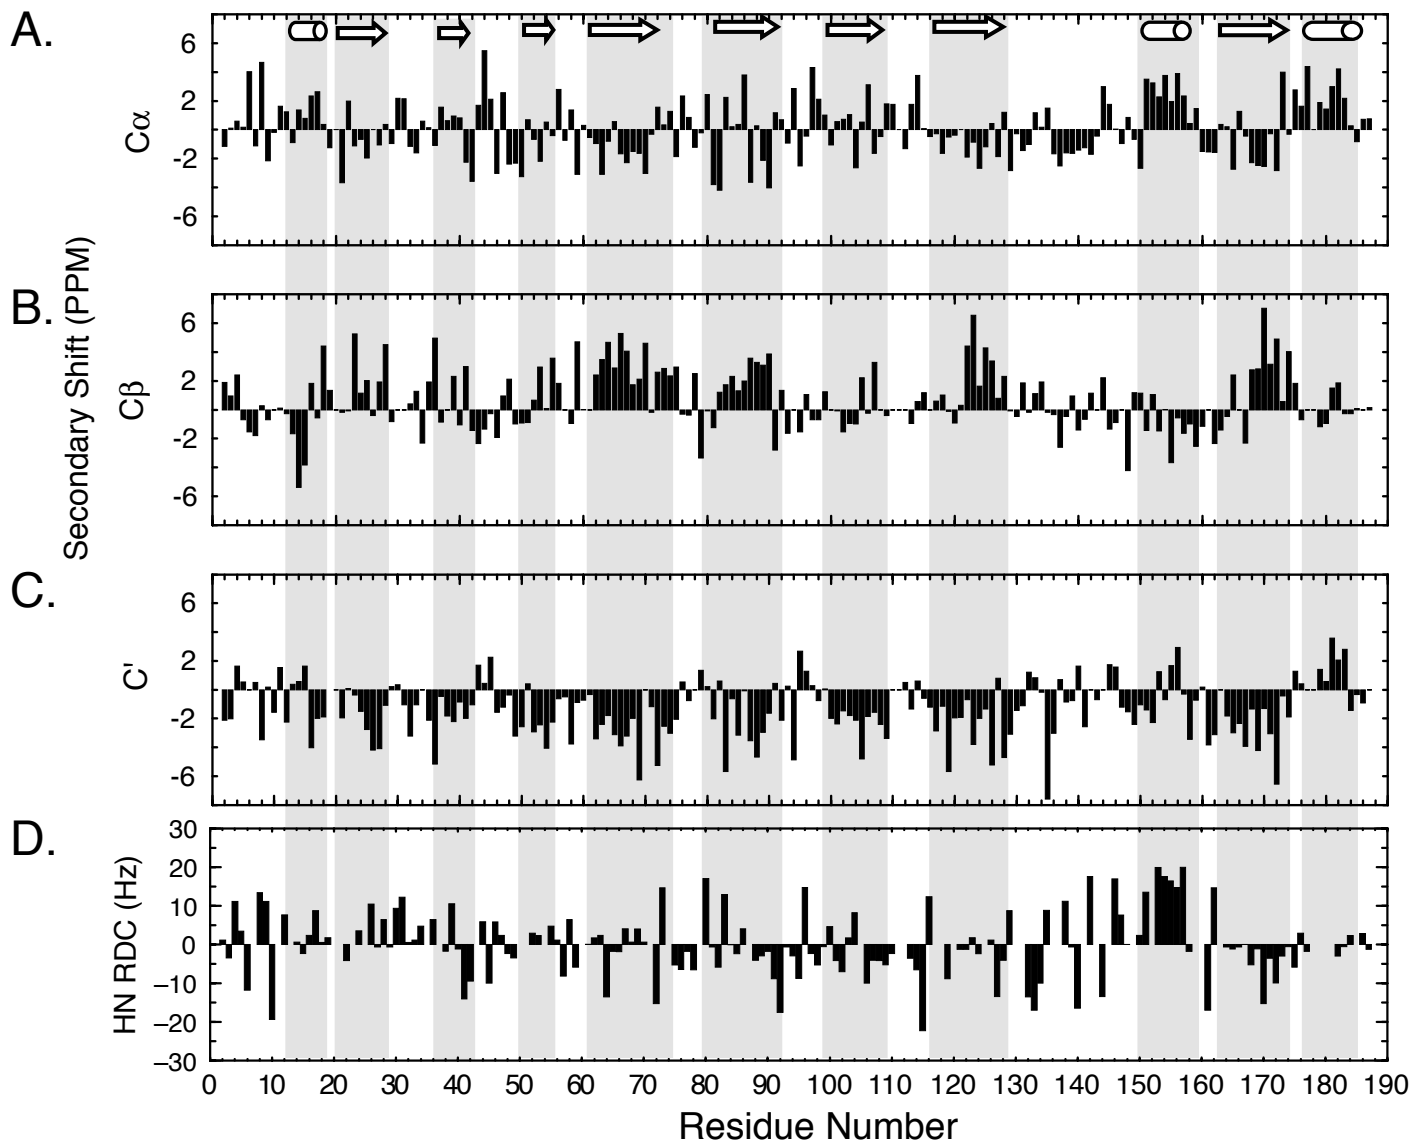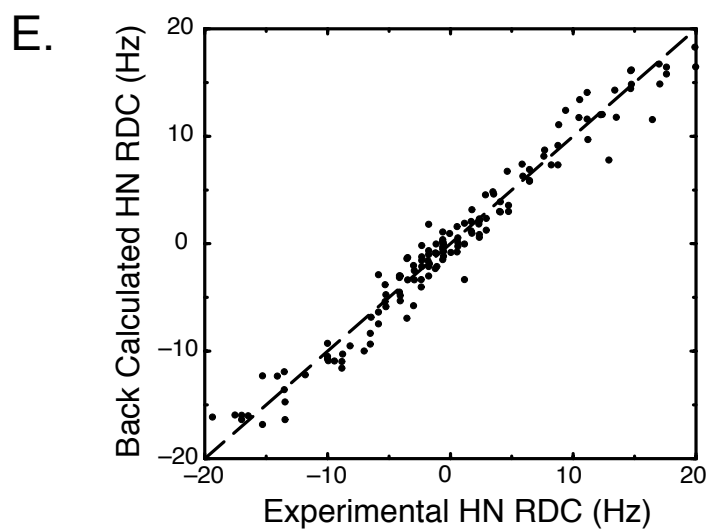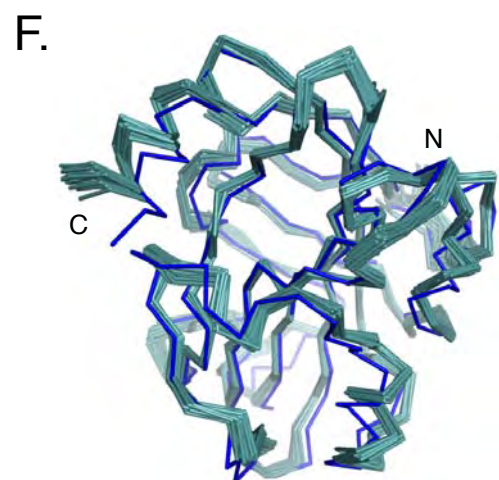

Supplement: supp_29_5_1306__1.pdf [file supp_29_5_1306__1.pdf]
